# Supplementary material for: Characterization of Rice NADPH Oxidase Genes and Their Expression under Various Environmental Conditions
Source: Int J Mol Sci. 2013 Apr 29;14(5):9440–58. doi: 10.3390/ijms14059440 (PMC3676792; doi:10.3390/ijms14059440)
Supplement: Supplementary file 1 [file ijms-14-09440-s001.pdf]

# Supplementary Information

**Table S1.** The Primers used for semi-quantitative RT-PCR analysis.

| Gene            | Forward Primer (5'→3') | Reverse Primer (5'→3') | Product size | Cycle numbers | Exon numbers |
|-----------------|------------------------|------------------------|--------------|---------------|--------------|
| <i>OsNox1</i>   | AAGGGAATAACGGACGAAA    | CCTCTGAACCACTCAAACG    | 296 bp       | 29            | 1            |
| <i>OsNox2</i>   | CACAACCTACCTAACAAGCGTC | TCCTCACCTTGCTATCTCC    | 411 bp       | 34            | 3            |
| <i>OsNox3</i>   | CTTTTGCTTATTGGTCTTGG   | TTGTTTCGTGAGTGTAGGG    | 477 bp       | 35            | 5            |
| <i>OsNox4</i>   | CAAGCGAGGTGTTTGTGGCA   | GGCTGTCACCATAACCACGGA  | 283 bp       | 34            | 4            |
| <i>OsNox5</i>   | TTACTGCTGGTTGGATTAGGA  | CATAGTAATGAGTGCTGACCGA | 366 bp       | 35            | 3            |
| <i>OsNox6</i>   | TCACCAAGTGGCACCAGAGG   | GAACGCTTGGCAGCAAATAG   | 360 bp       | 32            | 3            |
| <i>OsNox7</i>   | GTCAAATGCTTATGCTGTCA   | TGTCCAGTCTCCGTTTGTT    | 223 bp       | 38            | 3            |
| <i>OsNox8</i>   | CCCAGCAACCTCGGCTACAT   | ACGCAGACGCAGTAGCCCAT   | 314 bp       | 38            | 1            |
| <i>OsNox9</i>   | CCGTAAGGATTGAGAAGGT    | GGGTCGTCGTAGATGTGGT    | 340 bp       | 45            | 3            |
| <i>OsFRO1</i>   | ATTGTGACAGGCATAGAAGTCG | GACTGGAAAGAACAGGAACG   | 333 bp       | 38            | 1            |
| <i>OsFRO7</i>   | GCCTGCTAATGTGGGTGAC    | GGAGACTTGCTGGCTTTGA    | 273 bp       | 36            | 1            |
| <i>OsActin1</i> | CAGCACATTCCAGCAGATGT   | TAGGCCGTTGAAAACCTTG    | 198 bp       | 24            | 2            |

**Table S2.** Primers used for real-time qRT-PCR analysis.

| Gene            | Forward Primer (5'→3') | Reverse Primer (5'→3')  | Exon numbers |
|-----------------|------------------------|-------------------------|--------------|
| <i>OsNox1</i>   | GGCTTCAATGCCTTCTGGT    | ATGGCTCCTAAACAACCGA     | 2            |
| <i>OsNox2</i>   | ATCCGCAAAATAAGCACCTCT  | CAGTAGCCCATCACATCAAAGAC | 1            |
| <i>OsNox3</i>   | TCAAGGCAGCGATTTACCC    | CTCGCAAGCCTTCCCCAAA     | 2            |
| <i>OsNox4</i>   | CACAAGGTTATCGCACTGACG  | AGCGATGAGTATGTTGGTTGA   | 1            |
| <i>OsNox5</i>   | CCAGTGGGTGGGAAAAGTG    | GTCCGATTGGCGGGTAAA      | 3            |
| <i>OsNox6</i>   | CCTTTCTCCATCACTTCAGCA  | GGGCCATCTACAAGCAACC     | 2            |
| <i>OsNox7</i>   | GTCAAATGCTTATGCTGTCA   | TGTCCAGTCTCCGTTTGTT     | 3            |
| <i>OsNox8</i>   | ACCTTACCTGCGATTTTCCA   | ACGAAGCAGTGGTGGGAGT     | 1            |
| <i>OsNox9</i>   | TACTTCGGGCAGACACGGAT   | GCGGGTTGCTGTCACTAAG3    | 1            |
| <i>OsFRO1</i>   | TCCTGTTCTTTCCAGTCGC    | GTTCTTGTCATTTCAGCATCT   | 1            |
| <i>OsFRO7</i>   | CTGGCATTTACGTTGGC      | CGGAGACTTGCTGGCTTTG     | 1            |
| <i>OsActin1</i> | GTGGTCGCCCTCCTGAAAG    | GGCTTAGCATTCTTGGGTCCG   | 2            |

© 2013 by the authors; licensee MDPI, Basel, Switzerland. This article is an open access article distributed under the terms and conditions of the Creative Commons Attribution license (<http://creativecommons.org/licenses/by/3.0/>).
